# Supplementary material for: Describing the complex chemistry of benthic seawater: from exometabolite sampling strategies to MS-based metabolomics
Source: Royal Society of Chemistry journal article supplement (doi:10.1039/d4np00064a), 2025-01-01
Supplement: d4np00064a1.pdf [file d4np00064a1.pdf]

## Describing the Complex Chemistry of Benthic Seawater: from Exometabolite Sampling Strategies to MS-Based Metabolomics

Morgane Mauduit,<sup>a,†</sup> Stéphane Greff,<sup>a</sup> Marie Derrien,<sup>a</sup> and Charlotte Simmler<sup>\*a</sup>

---

<sup>a</sup> Institut Méditerranéen de Biodiversité et d'Écologie Marine et Continentale, IMBE UMR CNRS 7263, IRD 237, Aix Marseille Université, Avignon Université, Endoume Marine Station, rue de la batterie des lions, 13007 Marseille,

<sup>†</sup> is now working at: Department of Biotechnology and Biomedicine, Technical University of Denmark, Søtofts Plads 221, 2800 Kgs. Lyngby, Denmark

<sup>\*</sup> Corresponding author

### SUPPORTING INFORMATION

Table of all described marine exometabolites (EMs)

| Organisms/<br>Ecosystems                                                                | Metabolites                   | Nº | MF                                                                            | SMILES                                                                                                                            | R   |
|-----------------------------------------------------------------------------------------|-------------------------------|----|-------------------------------------------------------------------------------|-----------------------------------------------------------------------------------------------------------------------------------|-----|
| <i>Sinularia Flexibilis</i><br>Eclipse Island<br>Australia                              | flexibilide                   | 4  | C <sub>20</sub> H <sub>30</sub> O <sub>4</sub>                                | C/C1=C\CC[C@]([C@H]2[C@H](CC[C@]3([C@H](O3)CC1)C<br>C(=C)C(=O)O2)(C)O                                                             | 1,2 |
|                                                                                         | dihydroflexibilide            | 5  | C <sub>20</sub> H <sub>32</sub> O <sub>4</sub>                                | C[C@H]1[C@H]2CC[C@]3([C@H](O3)CC/C=C/CC[C@]([C@<br>@H](C2)OC1=O)(C)O)/C/C                                                         |     |
| <i>Sarcophyton crassocaule</i><br>Eclipse Island<br>Australia                           | sarcophine                    | 6  | C <sub>20</sub> H <sub>28</sub> O <sub>3</sub>                                | C/C1=C\CC[C@]2([C@H](O2)CC/C=C/[C@H]3C=C(C(=O)O3)C<br>CC1)/C/C                                                                    | 1   |
|                                                                                         | sarcophytoxide                | 7  | C <sub>20</sub> H <sub>30</sub> O <sub>2</sub>                                | C/C1=C\CC[C@]2([C@H](O2)CC/C=C/[C@H]3C=C(CO3)C)CC1<br>)/C/C                                                                       |     |
| <i>Aplysina fistularis</i><br>Casa Cove, La Jolla<br>California<br>&                    | aerothionin                   | 1  | C <sub>24</sub> H <sub>26</sub> Br <sub>4</sub> N <sub>4</sub> O <sub>8</sub> | COC1=C([C@H]([C@]2(CC(=NO2)C(=O)NCCCCN(=O)C3=NO[C<br>@]4(C3)C=C(C=C([C@H]4O)Br)OC)Br)C=C1Br)O)Br                                  | 3,4 |
|                                                                                         | homoaerothionin               | 2  | C <sub>25</sub> H <sub>28</sub> Br <sub>4</sub> N <sub>4</sub> O <sub>8</sub> | COC1=C([C@H]([C@]2(CC(=NO2)C(=O)NCCCCN(=O)C3=NO[C<br>@]4(C3)C=C(C=C([C@H]4O)Br)OC)Br)C=C1Br)O)Br                                  |     |
| <i>Aplysina cavernicola</i><br>Aquaria<br>Mediterranean Sea                             | aerophobin 1                  | 11 | C <sub>15</sub> H <sub>16</sub> Br <sub>2</sub> N <sub>4</sub> O <sub>4</sub> | COC1=C([C@H]([C@]2(CC(=NO2)C(=O)NCCCC=CN=CN3)C=C1Br<br>O)Br                                                                       | 4,5 |
|                                                                                         | aplysine 1                    | 12 | C <sub>14</sub> H <sub>19</sub> Br <sub>2</sub> N <sub>3</sub> O <sub>4</sub> | O=C(C1=NO[C@]2([C@H](O)C(Br)=C(OC)C(Br)=C2)C1)NCCCC<br>N                                                                          |     |
|                                                                                         | purealidin L                  | 13 | C <sub>15</sub> H <sub>21</sub> Br <sub>2</sub> N <sub>5</sub> O <sub>4</sub> | COC1=C([C@H]([C@]2(CC(=NO2)C(=O)NCCCCN=C(N)N)C=C1Br<br>O)Br                                                                       |     |
| <i>Ircinia felix</i><br>Santa Marta Bay,<br>Caribbean Coast of<br>Colombia              | thiobismethane                | 36 | C <sub>2</sub> H <sub>6</sub> S                                               | CSC                                                                                                                               | 6   |
|                                                                                         | methyl isocyanide             | 37 | C <sub>2</sub> H <sub>3</sub> N                                               | C[N+]#[C-]                                                                                                                        |     |
|                                                                                         | methyl isothiocyanate         | 38 | C <sub>2</sub> H <sub>3</sub> NS                                              | CN=C=S                                                                                                                            |     |
| <i>Geodia barretti</i><br>Koster Fjord area<br>Sweden                                   | barettin                      | 8  | C <sub>17</sub> H <sub>19</sub> BrN <sub>6</sub> O <sub>2</sub>               | C1=CC2=C(C=C1Br)NC=C2/C=C\3/C(=O)N([C@H](C(=O)N3)CCCN=C<br>(N)N                                                                   | 7   |
|                                                                                         | 8,9-dihydrobarettin           | 9  | C <sub>17</sub> H <sub>21</sub> BrN <sub>6</sub> O <sub>2</sub>               | C1=CC2=C(C=C1Br)NC=C2CC3C(=O)N(C(=O)N3)CCCN=C(N)N                                                                                 |     |
| Sponge<br>microorganisms<br>Pacific Ocean/<br>South China                               | jasplakinolide                | 10 | C <sub>36</sub> H <sub>34</sub> BrN <sub>4</sub> O <sub>6</sub>               | BrC1=C(C2=CC=CC=C2N1)C[C@H](N(C)C([C@H](C)NC([C@H](<br>C)C/C(C)=C\([C@H](C)C3)=O)=O)C(N[C@H](C4=CC=C(O)C=C4)<br>CC(O[C@H]3C)=O)=O | 8   |
|                                                                                         | jasplakinolide B<br>jaspamide |    | C <sub>36</sub> H <sub>43</sub> BrN <sub>4</sub> O <sub>7</sub>               | BrC1=C(C2=CC=CC=C2N1)C[C@H](N(C)C([C@H](C)NC([C@H](<br>C)C/C(C)=C\([C@H](C)C3)=O)=O)C(N[C@H](C4=CC=C(O)C=C4)<br>CC(O[C@H]3C)=O)=O |     |
|                                                                                         | jasplakinolide C              |    | C <sub>36</sub> H <sub>45</sub> BrN <sub>4</sub> O <sub>7</sub>               | BrC1=C(C2=CC=CC=C2N1)C[C@H](N(C)C([C@H](C)NC([C@H](<br>C)CC3=C(=O)C(N[C@H](C4=CC=C(O)C=C4)CC(O[C@H](C[C@<br>H](C)C3O)C)=O)=O      |     |
| <i>Crambe crambe</i><br>Mediterranean Sea                                               | crambescidin 816              | 32 | C <sub>45</sub> H <sub>80</sub> N <sub>6</sub> O <sub>7</sub>                 | CCCC1=CCCC2(O1)CC3CCC4(N3C(=NC5(C4(=O)O)CCCCCCCCCCCC<br>CCCC(=O)N(CCCN)CC(CCN)O)CCCC(O5)C)N2)O                                    | 9   |
|                                                                                         | crambescidin A2 462           | 33 | C <sub>25</sub> H <sub>47</sub> N <sub>6</sub> O <sub>2</sub>                 | O=C(C1=C(CCC2)N2C(N)=NC1CCCCCCCCCCCC)OCCCC/N=C(N)/N                                                                               |     |
|                                                                                         | crambescidin 359              |    | C <sub>21</sub> H <sub>33</sub> N <sub>3</sub> O <sub>2</sub>                 | [H][C@]([CCC1C2)(N13)CC4(CCC=C[C@H](CC)O4)N=C3N[C@]52<br>CCC[C@H](C)O5                                                            | 10  |
|                                                                                         | crambescidin acid             | 34 | C <sub>22</sub> H <sub>33</sub> N <sub>3</sub> O <sub>4</sub>                 | [H][C@]([CCC1C2C(O)=O)(N13)CC4(CCC=C[C@H](CC)O4)N=C3N[<br>C@]52CCC[C@H](C)O5                                                      |     |
|                                                                                         | crambescidin 401              |    | C <sub>22</sub> H <sub>31</sub> N <sub>3</sub> O <sub>4</sub>                 | O=C(C1=C2CC[C@](N23)([H])C[C@]4(O[C@H](CC)C=CCC4)N=C3<br>N[C@]51O[C@H](C)CCC5)O                                                   |     |
|                                                                                         | crambescidin B 281            |    | C <sub>16</sub> H <sub>31</sub> N <sub>3</sub> O                              | N=C(N1)N[C@H](CCCCCCCC)[C@]21OCCC2                                                                                                |     |
|                                                                                         | crambescidin B 253            | 35 | C <sub>14</sub> H <sub>27</sub> N <sub>3</sub> O                              | CCCCCCC[C@H](N=C(N)N1)CC21CCCO2                                                                                                   |     |
| <i>Ircinia campana</i><br>&<br><i>Spheciospongia vesparium</i><br>Florida's coral reefs | xanthosine                    | 26 | C <sub>10</sub> H <sub>12</sub> N <sub>4</sub> O <sub>6</sub>                 | C1=NC2=C(N1[C@H]3[C@H]([C@H]([C@H](O3)CO)O)O)NC(=<br>O)NC2=O                                                                      | 11  |
|                                                                                         | tyrosine                      | 27 | C <sub>9</sub> H <sub>11</sub> NO <sub>3</sub>                                | C1=CC(=CC=C1[C@H](C(=O)O)N)O                                                                                                      |     |
| <i>Ulva mutabilis</i><br>Cultivated, Aquaria                                            | glycerol                      | 28 | C <sub>3</sub> H <sub>8</sub> O <sub>3</sub>                                  | C(C(CO)O)O                                                                                                                        | 12  |
|                                                                                         | 2,4,6-tribromophenol          | 29 | C <sub>6</sub> H <sub>3</sub> Br <sub>3</sub> O                               | C1=C(C=C(C=C1Br)O)Br)Br                                                                                                           |     |

| Organisms/<br>Ecosystems                                                                                                                   | Metabolites                     | Nº | MF                                                                            | SMILES                                                                                                                                                      | R         |
|--------------------------------------------------------------------------------------------------------------------------------------------|---------------------------------|----|-------------------------------------------------------------------------------|-------------------------------------------------------------------------------------------------------------------------------------------------------------|-----------|
| <i>Callinectes sapidus</i><br>Urine, Aquaria<br><i>Gersemia antarctica</i><br>McMurdo Sound,<br>Antartica                                  | trigonelline                    | 30 | C <sub>7</sub> H <sub>7</sub> NO <sub>2</sub>                                 | C[N+]=CC=CC(=C1)C(=O)[O-]                                                                                                                                   | 13,<br>14 |
|                                                                                                                                            | homarine                        | 31 | C <sub>7</sub> H <sub>7</sub> NO <sub>2</sub>                                 | C[N+]=CC=CC=C1C(=O)[O-]                                                                                                                                     |           |
| Coral genus:<br><i>Acropora</i> ,<br><i>Platygyra</i><br>Saadiyat Reef,<br>Abu Dhabi, UAE                                                  | 17-β estradiol                  | 39 | C <sub>18</sub> H <sub>24</sub> O <sub>2</sub>                                | C[C@]12CC[C@H]3[C@H]([C@@H]1CC[C@H]2O)CCC4=C3C=CC(=C4)O                                                                                                     | 15        |
|                                                                                                                                            | coumaroyl-homoserine lactone    | 40 | C <sub>13</sub> H <sub>13</sub> NO <sub>4</sub>                               | O=C(N[C@H]1C(OCC1=O)/C=C/C2=CC=C(O)C=C2                                                                                                                     |           |
|                                                                                                                                            | bromofuranone                   | 41 | C <sub>4</sub> H <sub>3</sub> BrO <sub>2</sub>                                | C1=COC(=O)C1Br                                                                                                                                              |           |
|                                                                                                                                            | malabaricone C                  | 42 | C <sub>21</sub> H <sub>26</sub> O <sub>5</sub>                                | C1=CC(=C(C(=C1)O)C(=O)CCCCCCCCC2=CC(=C(C=C2)O)O)O                                                                                                           |           |
| <i>Diploria strigosa</i> &<br><i>Orbicella faveolata</i> ,<br>Coral-turf algae<br>interface<br>Caribbean island of<br>Curaçao              | ceramide 18:1/16:0              | 18 | C <sub>34</sub> H <sub>67</sub> NO <sub>3</sub>                               | CCCCCCCCCCCCCCCC(=O)N[C@@H](CO)[C@@H](/C=C/CCCCCCC<br>CCCCC)O                                                                                               | 16        |
| <i>Gorgonia ventalina</i><br>US Virgin Islands                                                                                             | indole-3-acetic acid            | 19 | C <sub>10</sub> H <sub>9</sub> NO <sub>2</sub>                                | C1=CC=C2C(=C1)C(=CN2)CC(=O)O                                                                                                                                | 17        |
| <i>Plexaura homomalla</i><br><i>Gorgonia ventalina</i><br><i>Pseudodiploria strigosa</i><br><i>Porites astreoides</i><br>US Virgin Islands | pantothenic acid                | 20 | C <sub>9</sub> H <sub>17</sub> NO <sub>5</sub>                                | CC(C)(CO)C(C(=O)NCCC(=O)O)O                                                                                                                                 |           |
| <i>Ramicrusta textilis</i><br>US Virgin Islands                                                                                            | riboflavin                      | 21 | C <sub>17</sub> H <sub>20</sub> N <sub>4</sub> O <sub>6</sub>                 | CC1=CC2=C(C=C1)N(C3=NC(=O)NC(=O)C3=N2)C[C@@H]([C@@<br>H])([C@@H](CO)O)O                                                                                     |           |
| US Virgin Islands                                                                                                                          | caffeine                        | 22 | C <sub>8</sub> H <sub>10</sub> N <sub>4</sub> O <sub>2</sub>                  | CN1C=NC2=C1C(=O)N(C(=O)N2)C                                                                                                                                 | 18        |
| US Virgin Islands                                                                                                                          | tryptophan                      | 23 | C <sub>11</sub> H <sub>12</sub> N <sub>2</sub> O <sub>2</sub>                 | C1=CC=C2C(=C1)C(=CN2)C[C@@H](C(=O)O)N                                                                                                                       | 19        |
| Florida's Coral Reef<br>habitats, from Dry<br>Tortugas to and<br>North Key<br>Largo/Biscayne Bay                                           | taurocholic acid                | 24 | C <sub>26</sub> H <sub>45</sub> NO <sub>7</sub> S                             | C[C@H](CCC(=O)NCCS(=O)(=O)O)[C@H]1CC[C@@H]2[C@@]1([C<br>@H](C[C@H]3[C@H]2[C@@H](C[C@H]4[C@@]3(CC[C@H](C4)O<br>C)O)C                                         |           |
|                                                                                                                                            | 5'-methylthioadenosine          | 25 | C <sub>11</sub> H <sub>15</sub> N <sub>5</sub> O <sub>3</sub> S               | CSC[C@H]1[C@H]([C@H]([C@@H]([C@@H](O1)N2C=NC3=C(N=CN=C32)<br>N)O)O                                                                                          |           |
| <i>Spongia officinalis</i><br>Mediterranean Sea                                                                                            | furospongine-1                  | 16 | C <sub>21</sub> H <sub>30</sub> O <sub>3</sub>                                | O[C@H](C[C@@H](C)CCCC1=COC=C1)C(C)C=C/C/C=C/C=C                                                                                                             | 5         |
|                                                                                                                                            | demethylfurospongine-4          | 15 | C <sub>25</sub> H <sub>34</sub> O <sub>5</sub>                                | O=C(O)/C(C)=C/CC/C(C(=O)O)=C/CC/C(C)=C/CC/C(C)=C/CCC1=CO<br>C=C1                                                                                            |           |
|                                                                                                                                            | 12-epi-deoxoscalarin            | 17 | C <sub>27</sub> H <sub>42</sub> O <sub>4</sub>                                | CC(O)[C@@H]1C[C@]2([H])[C@@]3(C)CCCC(C)(C)[C@]3([H])CC[C<br>@@]2(C)[C@@]4([H])[C@@]1(C)[C@]5([H])C(CO[C@H]5O)=CC4<br>=O                                     |           |
| <i>Agelas oroides</i><br>Mediterranean Sea                                                                                                 | longamide B methylester         | 14 | C <sub>10</sub> H <sub>10</sub> Br <sub>2</sub> N <sub>2</sub> O <sub>3</sub> | O=C(OC)C[C@H]1CNC(C2=CC(Br)=C(Br)N21)=O                                                                                                                     | 20        |
| <i>Agelas conifera</i><br>Caribbean Sea                                                                                                    | oroidin                         | 3  | C <sub>11</sub> H <sub>11</sub> Br <sub>2</sub> N <sub>5</sub> O              | C1=C(NC(=C1Br)Br)C(=O)NC/C=C/C2=CN=C(N2)N                                                                                                                   | 21        |
| Benthic diatom<br><i>Seminavis robusta</i><br>(laboratory culture)                                                                         | Sex-Inducing Pheromone<br>SIP + | 43 | C <sub>29</sub> H <sub>45</sub> N <sub>7</sub> O <sub>16</sub> S <sub>3</sub> | O=C(N(C[C@H]1O)[C@H](C1)C(N[C@H](C)O)=O)[C@H](C(=O)<br>O)OS(=O)(O)=O)[C@H](C[C@H]2O)N(C2)C([C@@H](NC3=O)C<br>SSC[C@H](N)C(N[C@H](C(N[C@H]3CC(C)C)=O)C)=O)=O |           |
| Microorganisms<br>from marine<br>sediments<br>(sand slope)<br>Mission Bay &<br>Cabrillo state,<br>Coast of California                      | chrysoeriol sulfate             | 46 | C <sub>16</sub> H <sub>12</sub> O <sub>9</sub> S                              | OC1=CC(OS(=O)(O)=O)=CC(OC(C2=CC=C(C(OC)=C2)O)=C3)=C1C3=<br>O                                                                                                | 22        |
|                                                                                                                                            | aplysiopsene A                  | 47 | C <sub>12</sub> H <sub>16</sub> O <sub>3</sub>                                | CC/C=C(/C)C1=CC(=C(C(=O)O1)C)OC                                                                                                                             |           |
|                                                                                                                                            | cabrillostatin                  | 44 | C <sub>18</sub> H <sub>33</sub> NO <sub>4</sub>                               | O=C(N[C@H]([C@H](C1)O)CC(C)CCCCCCC(OC1=O)C                                                                                                                  |           |
|                                                                                                                                            | cabrillospiral A                | 45 | C <sub>29</sub> H <sub>40</sub> BrClO <sub>9</sub>                            | CC(CBr)[C@]1([H])C[C@H](O)[C@H](Cl)[C@]2(CCC(C(C3C=C<br>C=C(O)C=C3)C)O)O2)O1)C[C@@](O/4)([H])[C@@H](O)CC4=C(CO<br>/C([H])=O                                 |           |

MF = molecular formula, N = attributed number in the manuscript, R = References as indicated below

## References:

- 1 J. C. Coll, B. F. Bowden, D. M. Tapiolas and W. C. Dunlap, *J. Exp. Mar. Bio. Ecol.*, 1982, **60**, 293–299.
- 2 B. A. Schulte, R. De Nys, G. J. Bakus, P. Crews, C. Eid, S. Naylor and L. V. Manes, *J. Chem. Ecol.*, 1991, **17**, 1327–1332.
- 3 R. P. Walker, J. E. Thompson and D. J. Faulkner, *Mar. Biol.*, 1985, **88**, 27–32.
- 4 M. Mauduit, S. Greff, G. Herbette, J.-V. Naubron, S. Chentouf, T. Huy Ngo, J.-W. Nam, S. Molinari, F. Mabrouki, E. Garayev, B. Baghdikian, T. Pérez and C. Simmler, *ACS Omega*, 2022, **7**, 43068–43083.
- 5 M. Mauduit, M. Derrien, M. Grenier, S. Greff, S. Molinari, P. Chevaldonné, C. Simmler and T. Pérez, *ACS Cent. Sci.*, 2023, **9**, 2084–2095.
- 6 C. Duque, A. Bonilla, E. Bautista and S. Zea, *Biochem. Syst. Ecol.*, 2001, **29**, 459–467.
- 7 M. Sjögren, P. R. Jonsson, M. Dahlström, T. Lundälv, R. Burman, U. Göransson and L. Bohlin, *J. Nat. Prod.*, 2011, **74**, 449–454.
- 8 J. J. La Clair, S. T. Loveridge, K. Tenney, M. O’Neil–Johnson, E. Chapman and P. Crews, *PLoS ONE*, 2014, **9**, e100474.
- 9 E. Ternon, L. Zarate, S. Chenesseau, J. Croue, R. Dumollard, M. T. Suzuki and O. P. Thomas, *Sci. Rep.*, 2016, **6**, 29474.
- 10 P. Vlachou, L. Goff, C. Alonso, A. Á. Pedro, J. Gallard, N. Fokialakis and J. Ouazzani, *Mar. Drugs*, 2018, **16**, 0152–0152.
- 11 C. L. Fiore, C. J. Freeman and E. B. Kujawinski, *PeerJ*, 2017, **5**, e2870.
- 12 T. Alsufyani, A. Weiss and T. Wichard, *Mar. Drugs*, 2017, **15**, 14.
- 13 R. X. Poulin, S. Lavoie, K. Siegel, D. A. Gaul, M. J. Weissburg and J. Kubanek, *PNAS*, 2018, **115**, 662–667.
- 14 M. Slattery, M. Hamann, J. McClintock, T. Perry, M. Puglisi and W. Yoshida, *Mar. Ecol. Prog. Ser.*, 1997, **161**, 133–144.
- 15 M. A. Ochsenkühn, P. Schmitt-Kopplin, M. Harir and S. A. Amin, *Commun. Biol.*, 2018, **1**, 1–10.
- 16 T. N. F. Roach, M. Little, M. G. I. Arts, J. Huckeba, A. F. Haas, E. E. George, R. A. Quinn, A. G. Cobián-Güemes, D. S. Naliboff, C. B. Silveira, M. J. A. Vermeij, L. W. Kelly, P. C. Dorrestein and F. Rohwer, *PNAS*, 2020, **117**, 13588–13595.
- 17 L. Weber, M. K. Soule, K. Longnecker, C. C. Becker, N. Huntley, E. B. Kujawinski and A. Apprill, *ISME Commun*, 2022, **2**, 1–13.
- 18 B. M. Garcia, C. C. Becker, L. Weber, G. J. Swarr, M. C. Kido Soule, A. Apprill and E. B. Kujawinski, *J. Proteome Res.*, 2024, **23**, 2041–2053.
- 19 C. C. Becker, L. Weber, B. Zgliczynski, C. Sullivan, S. Sandin, E. Muller, A. S. Clark, M. C. Kido Soule, K. Longnecker, E. B. Kujawinski and A. Apprill, *PNAS Nexus*, 2023, **2**, pgad287.
- 20 E. Richelle-Maurer, M. J. De Kluijver, S. Feio, S. Gaudêncio, H. Gaspar, R. Gomez, R. Tavares, G. Van de Vyver and R. W. M. Van Soest, *Biochem. Syst. Ecol.*, 2003, **31**, 1073–1091.
- 21 F. A. Klapper, C. Kiel, P. Bellstedt, W. Vyverman and G. Pohnert, *Angew.Chem. Int.Ed.*, 2023, **62**, e202307165.
- 22 A. Bogdanov, M. N. Salib, A. B. Chase, H. Hammerlindl, M. N. Muskat, S. Luedtke, E. B. da Silva, A. J. O’Donoghue, L. F. Wu, S. J. Altschuler, T. F. Molinski and P. R. Jensen, *Nat. Commun.*, 2024, **15**, 5230.
